# Supplementary material for: Pathogenic Escherichia coli, Salmonella spp. and Campylobacter spp. in Two Natural Conservation Centers of Wildlife in Portugal: Genotypic and Phenotypic Characterization
Source: MDPI journal article supplement (doi:10.3390/microorganisms10112132), 2022-10-27
Supplement: s1 [file s1]

| Target gene | Primer sequence (5'-3')                               | Thermal profile                                            | Amplicon size (pb) | Reference    |
|-------------|-------------------------------------------------------|------------------------------------------------------------|--------------------|--------------|
| <i>eae</i>  | GGYCAGCGTTTTTCCTTCCTG<br>TCGTCACCARAGGAATCGGAG        |                                                            | 377                | Persson 2007 |
| <i>aggR</i> | CATTCTTGATTGCATAAGGATCTGG<br>GCAATCAGATTAARCAGCGATACA |                                                            | 426                | Nadia 2012   |
| <i>eltI</i> | AACGTTCCGGAGGTCTTATG<br>CAACCTTGTTGGTGCATGATG         | 95°C 15 min<br>35x: 94°C 50 sec, 55.5°C 40 sec, 72°C 1 min | 511                |              |
| <i>estp</i> | ACTGAATCACTTGACTCTTCA<br>TCACAGCAGTAAAATGTGTTGT       | 72°C 3 min<br>4°C ∞                                        | 120                | Fujioka 2013 |
| <i>esth</i> | TTCACCTTCCCTCAGGATG<br>ATAGCACCCGGTACAAGCAG           |                                                            | 172                |              |
| <i>ipaH</i> | TTGACCGCCTTCCGATACC<br>ATCCGCATCACCGCTCAGAC           |                                                            | 647                | Persson 2007 |
| <i>stx1</i> | GTACGGGGATGCAGATAAATCGC<br>AGCAGTCATTACATAAGAACYCCACT | 95°C 15 min<br>35x: 94°C 50 sec, 60°C 40 sec, 72°C 1 min   | 206                |              |
| <i>stx2</i> | GCACTGTCTGAAACTGCTCCTGT<br>ATTAAACTGCACTTCAGCAAATCC   | 72°C 3 min<br>4°C ∞                                        | 627                | Scheutz 2012 |
|             | CGCTGTCTGAGGCATCTCCGCT<br>TAAACTTCACCTGGGCAAAGCC      |                                                            |                    |              |

*eae* , intimin-coding gene; *aggR* , gene encoding a transcriptional regulator of enteroaggregative *E. coli*; *eltI* , eat labile toxin coding gene; *estp* , gene encoding the heat stable enterotoxin A (porcine variant); *esth* , gene encoding the heat stable enterotoxin A (human variant); *ipaH* , invasion plasmid antigen H gene; *stx* , Stx-coding gene. Primers: R = A or G; Y = C or T.
