# Supplementary material for: Pathogenic Escherichia coli, Salmonella spp. and Campylobacter spp. in Two Natural Conservation Centers of Wildlife in Portugal: Genotypic and Phenotypic Characterization
Source: MDPI journal article supplement (doi:10.3390/microorganisms10112132), 2022-10-27
Supplement: s1 [file s1]

| Isolate ID     | Year/Month | Animal      | Pathotype | AMR phenotype | Serotype     | Virulence genes                                                                                                                                                 | Resistance genes                               | Plasmids                                                  | MLST       | Genetic cluster | Sample ID | Ena Acession # |
|----------------|------------|-------------|-----------|---------------|--------------|-----------------------------------------------------------------------------------------------------------------------------------------------------------------|------------------------------------------------|-----------------------------------------------------------|------------|-----------------|-----------|----------------|
| <i>E. coli</i> |            |             |           |               |              |                                                                                                                                                                 |                                                |                                                           |            |                 |           |                |
| Ec-TM1         | 2020/07    | Fallow deer | STEC      | Susceptible   | O75:H8       | <i>cba, cma, ehxA, espi, gad, iha, ireA, iss, lpfA, ompT, senB, stx1c, stx2b, subA, terC, traT</i>                                                              | No                                             | -                                                         | 13         | 5               | PT_EC0001 | ERS12460637    |
| Ec-TM2         | 2020/07    | Fallow deer | STEC      | Susceptible   | O146:H21     | <i>cba, cma, ehxA, espi, gad, iha, ireA, iss, iucC, iutA, lpfA, mchB, mchC, mchF, ompT, senB, stx2b, subA, terC, traT</i>                                       | No                                             | -                                                         | 442        | 6               | PT_EC0002 | ERS12460638    |
| Ec-TM3         | 2020/07    | Fallow deer | STEC      | Susceptible   | O146:H21     | <i>cba, cma, ehxA, espi, gad, iha, ireA, iss, iucC, iutA, lpfA, mchB, mchC, mchF, ompT, senB, stx2b, subA, terC, traT</i>                                       | No                                             | -                                                         | 442        | 6               | PT_EC0003 | ERS12460639    |
| EC-TM14        | 2020/07    | Red deer    | EPEC      | Susceptible   | O121:HND     | <i>eae, astA, celb, ehxA, espA, espB, espF, espi, etpD, gad, iha, lpfA, nleA, nleB, nleC, ompT, tccP, terC, tir, toxB, traT</i>                                 | No                                             | -                                                         | 655        | 1               | PT_EC0004 | ERS12460640    |
| EC-TM15        | 2020/07    | Fallow deer | STEC      | Susceptible   | O75:H8       | <i>cba, cma, ehxA, espi, gad, iha, ireA, iucC, iutA, lpfA, senB, stx1c, stx2b, subA, terC, traT</i>                                                             | No                                             | -                                                         | 13         | 7               | PT_EC0005 | ERS12460641    |
| EC-TM17        | 2020/07    | Wild boars  | ETEC      | TET, SMX      | O28ac/O42:H8 | <i>f17A, f17G, gad, hra, lpfA, stb, trC</i>                                                                                                                     | <i>tet(B)</i> , <i>suI2</i>                    | Not found                                                 | 109        | -               | PT_EC0006 | ERS12460642    |
| Ec-TM22        | 2020/07    | Fallow deer | STEC      | Susceptible   | O146:H28     | <i>astA, ehxA, gad, hra, iha, ireA, iss, lpfA, ompT, subA, mchB, mchC, mchF, stx2b, terC, traT, usp</i>                                                         | No                                             | -                                                         | 738        | -               | PT_EC0007 | ERS12460643    |
| Ec-TM23        | 2020/07    | Fallow deer | STEC      | Susceptible   | O146:H21     | <i>cba, cma, ehxA, espi, gad, iha, ireA, iss, iucC, iutA, lpfA, mchB, mchC, mchF, ompT, senB, stx2b, subA, terC, traT</i>                                       | No                                             | -                                                         | 442        | 6               | PT_EC0008 | ERS12460644    |
| Ec-TM24        | 2020/07    | Red deer    | STEC      | Susceptible   | O146:H28     | <i>astA, ehxA, gad, hra, iha, ireA, iss, lpfA, mchB, mchC, mchF, ompT, stx2b, subA, terC, traT, usp</i>                                                         | No                                             | -                                                         | 738        | -               | PT_EC0009 | ERS12460645    |
| Ec-TM25        | 2020/07    | Red deer    | STEC      | Susceptible   | OND:H28      | <i>astA, ehxA, gad, hra, iha, ireA, iss, lpfA, mchB, mchC, mchF, ompT, stx2b, subA, terC, traT, usp</i>                                                         | No                                             | -                                                         | 738        | 7               | PT_EC0010 | ERS12460646    |
| Ec-TM26        | 2020/07    | Wild boars  | EPEC      | AMP, CHL, SMX | O145:HND     | <i>astA, cea, chA, cij, eae, ehxA, espA, espB, espF, espi, etpD, gad, iha, iss, iucC, iutA, katP, neuC, nleA, nleB, nleC, ompT, tccP, terC, tir, toxB, traT</i> | <i>blaTEM-1B, floR, sul2</i>                   | IncFII (100%), IncFIB (96.92%)                            | 137        | 9               | PT_EC0011 | ERS12460647    |
| Ec-TM27        | 2020/07    | Fallow deer | STEC      | Susceptible   | O146:H21     | <i>cba, cma, ehxA, espi, gad, iha, ireA, iss, lpfA, mchB, mchC, mchF, ompT, stx2b, sub2, terC, traT</i>                                                         | No                                             | -                                                         | 442        | 4               | PT_EC0012 | ERS12460648    |
| Ec-TM28        | 2020/07    | Fallow deer | STEC      | Susceptible   | O75:H8       | <i>cba, cma, ehxA, espi, gad, iha, ireA, iss, lpfA, ompT, senB, stx1c, stx2b, subA, terC, traT</i>                                                              | No                                             | -                                                         | 13         | 5               | PT_EC0013 | ERS12460649    |
| Ec-TM29-2      | 2020/07    | Fallow deer | STEC      | Susceptible   | O146:H28     | <i>astA, ehxA, gad, hra, iha, ireA, iss, mchB, mchC, mchF, ompT, stx2b, subB, terC, traT, usp</i>                                                               | No                                             | -                                                         | 738        | -               | PT_EC0014 | ERS12460650    |
| Ec-TM29-4      | 2020/07    | Fallow deer | STEC      | Susceptible   | OND:H8       | <i>cba, cma, ehxA, espi, gad, iha, ireA, iss, lpfA, ompT, senB, stx1c, stx2b, subA, terC, traT</i>                                                              | No                                             | -                                                         | 13         | 5               | PT_EC0015 | ERS12460651    |
| Ec-TM30-1      | 2020/07    | Fallow deer | STEC      | Susceptible   | O146:H28     | <i>astA, ehxA, gad, hra, iha, ireA, iss, lpfA, mchB, mchC, mchF, ompT, stx2b, subA, terC, traT, usp</i>                                                         | No                                             | -                                                         | 738        | 7               | PT_EC0017 | ERS12460653    |
| Ec-TM30-2      | 2020/07    | Fallow deer | EPEC      | Susceptible   | O156:H25     | <i>astA, eae, ehxA, espA, espF, espi, espP, gad, lpfA, nleA, nleB, ompT, terC, tir, traT</i>                                                                    | No                                             | -                                                         | 300        | 3               | PT_EC0016 | ERS12460652    |
| Ec-TM31        | 2020/07    | Fallow deer | STEC      | Susceptible   | O75:H8       | <i>cba, cma, ehxA, espi, gad, iha, ireA, iss, ilpfA, ompT, semB, stx1c, stx2b, subA, terC, traT</i>                                                             | No                                             | -                                                         | 13         | 5               | PT_EC0018 | ERS12460654    |
| Ec-TM36        | 2020/07    | Wild boars  | ETEC      | Susceptible   | O98:H5       | <i>astA, fyuA, irp2, iss, stb, terC, traT</i>                                                                                                                   | No                                             | -                                                         | 2951       | -               | PT_EC0019 | ERS12460655    |
| Ec-TM38        | 2020/07    | Red deer    | STEC      | Susceptible   | O110:H31     | <i>chuA, exhA, fyuA, gad, iha, ireA, irp2, kpsE, mchF, ompT, stx2, subA, terC, traT, vat, yjcV</i>                                                              | No                                             | -                                                         | 812        | -               | PT_EC0020 | ERS12460656    |
| Ec-TM42        | 2020/10    | Fallow deer | STEC      | Susceptible   | O146:H28     | <i>astA, ehxA, gad, hra, iha, ireA, iss, lpfA, mchB, mchC, mchF, ompT, stx2b, subA, terC, traT, usp</i>                                                         | No                                             | -                                                         | 738        | -               | PT_EC0021 | ERS12460657    |
| Ec-TM47        | 2020/10    | Wild boars  | ETEC      | Susceptible   | O182:H19     | <i>capU, fyupA, gad, iha, irp2, sitA, sta1, stb, terC, traT</i>                                                                                                 | No                                             | -                                                         | 10         | -               | PT_EC0022 | ERS12460658    |
| Ec-TM54        | 2020/10    | Fallow deer | STEC      | Susceptible   | OND:H21      | <i>cba, cma, ehxA, espi, gad, iha, ireA, iss, iucC, iutA, lpfA, mchB, mchC, mchF, ompT, stx2b, subA, terC, traT</i>                                             | No                                             | -                                                         | 11692-like | -               | PT_EC0023 | ERS12460659    |
| Ec-TM55        | 2020/10    | Fallow deer | EPEC      | Susceptible   | O121:HND     | <i>astA, celb, eae, ehxA, espA, espB, espF, espi, etpD, gad, lpfA, nleA, nleB, nleC, ompT, tccP, terC, tir, toxB, traT</i>                                      | No                                             | -                                                         | 655        | 1               | PT_EC0024 | ERS12460660    |
| Ec-TM56        | 2020/10    | Fallow deer | STEC      | Susceptible   | O75:H8       | <i>cba, cma, ehxA, espi, gad, iha, ireA, iss, lpfA, ompT, senB, stx1c, stx2b, subA, terC, traT</i>                                                              | No                                             | -                                                         | 13         | 5               | PT_EC0025 | ERS12460661    |
| Ec-TM57        | 2020/10    | Wild boars  | EPEC      | Susceptible   | O70:H11      | <i>astA, cea, cij, cma, eae, ehxA, espA, espB, espF, espi, espi, etpu, gad, iha, irp2, iss, iucC, iutA, lpfA, nleA, nleB, ompT, tccP, terC, tir, traT</i>       | No                                             | -                                                         | 29         | -               | PT_EC0026 | ERS12460662    |
| Ec-TM61        | 2020/10    | Red deer    | STEC      | Susceptible   | O27:H30      | <i>astA, celb, chuA, eilA, iha, ireA, iss, mchB, mchC, mchF, ompT, stx2b, subA, terC, traT</i>                                                                  | No                                             | -                                                         | 753        | -               | PT_EC0027 | ERS12460663    |
| Ec-TM64        | 2020/10    | Fallow deer | EPEC      | Susceptible   | O121:HND     | <i>astA, celb, eae, ehxA, espA, espB, espF, espi, etpD, gad, iha, lpfA, nleA, nleB, nleC, ompT, tccP, terC, tir, toxB, traT</i>                                 | No                                             | -                                                         | 655        | 1               | PT_EC0028 | ERS12460664    |
| Ec-TM65        | 2020/10    | Fallow deer | EPEC      | Susceptible   | O26:H11      | <i>astA, cba, cij, cma, eae, efa1, ehxA, espA, espB, espF, espi, etpD, fyuA, gad, iha, irp2, iss, iucC, iutA, lpfA, nleA, nleB, ompT, tccP, terC, tir, traT</i> | No                                             | -                                                         | 29         | -               | PT_EC0029 | ERS12460665    |
| Ec-TM66        | 2020/10    | Red deer    | STEC      | Susceptible   | O27:H30      | <i>astA, celb, chuA, eilA, espi, iha, ireA, iss, mchB, mchC, mchF, ompT, stx2b, subA, terC, traT</i>                                                            | No                                             | -                                                         | 753        | -               | PT_EC0030 | ERS12460666    |
| Ec-TM67        | 2020/11    | Wild boars  | EPEC      | Susceptible   | O167:H9      | <i>astA, cij, eae, eilA, espA, espB, espi, gad, iss, lpfA, nleA, ompT, terC, tir</i>                                                                            | No                                             | -                                                         | 2538       | -               | PT_EC0031 | ERS12460667    |
| Ec-TM69        | 2020/11    | Fallow deer | EPEC      | Susceptible   | OND:HND      | <i>astA, cea, chuA, cij, eae, enxA, espA, espB, espi, etpu, gad, iha, iss, iucC, iutA, katP, neuC, nleA, nleB, nleC, ompT, tccP, terC, tir, traT</i>            | No                                             | -                                                         | 137        | 9               | PT_EC0032 | ERS12460668    |
| Ec-TM71        | 2020/11    | Fallow deer | STEC      | Susceptible   | O75:H8       | <i>cba, cma, ehxA, espi, gad, iha, ireA, iss, lpfA, ompT, senB, stx1c, stx2b, terC, traT</i>                                                                    | No                                             | -                                                         | 13         | -               | PT_EC0033 | ERS12460669    |
| Ec-TM72        | 2020/11    | Fallow deer | STEC      | Susceptible   | O146:H28     | <i>astA, ehxA, gad, hra, iha, ireA, iss, lpfA, mchB, mchC, mchF, ompT, stx2b, subA, terC traT, usp</i>                                                          | No                                             | -                                                         | 738        | -               | PT_EC0034 | ERS12460670    |
| Ec-TM73        | 2020/11    | Fallow deer | STEC      | Susceptible   | O146:H21     | <i>cba, cma, ehxA, espi, gad, iha, ireA, iss, iucC, iutA, lpfA, mchB, mchC, mchF, ompT, senB, stx2b, subA, terC, traT</i>                                       | No                                             | -                                                         | 442        | 6               | PT_EC0035 | ERS12460671    |
| Ec-TM74        | 2020/11    | Fallow deer | STEC      | Susceptible   | O75:H8       | <i>cba, cma, ehxA, espi, gad, iha, ireA, iucC, iutA, lpfA, senB, stx1c, stx2b, subA, terC, traT</i>                                                             | No                                             | -                                                         | 13         | 7               | PT_EC0036 | ERS12460672    |
| Ec-TM81        | 2020/11    | Wild boars  | STEC      | Susceptible   | O27:H30      | <i>astA, chuA, eilA, gad, iha, ireA, iss, mchB, ,mchC, mchF, ompT, stx2b, terC, traT</i>                                                                        | No                                             | -                                                         | 753        | 8               | PT_EC0037 | ERS12460673    |
| Ec-TM82        | 2020/11    | Wild boars  | STEC      | Susceptible   | O146:H21     | <i>cba, cma, ehxA, espi, gad, iha, ireA, iss, iucC, iutA, lpfA, mchB, mchC, mchF, ompT, senB, stx2b, terC, traT</i>                                             | No                                             | -                                                         | 442        | 6               | PT_EC0038 | ERS12460674    |
| Ec-TM84        | 2020/11    | Wild boars  | STEC      | Susceptible   | O146:H21     | <i>cba, cma, espi, gad, iha, ireA, iss, iucC, iutA, lpfA, mchB, mchC, mchF, ompT, stx2b, subA, terC, traT</i>                                                   | No                                             | -                                                         | 442        | 4               | PT_EC0039 | ERS12460675    |
| Ec-TM86        | 2020/11    | Fallow deer | STEC      | Susceptible   | O27:H30      | <i>astA, chuA, eilA, espi, fyuA, iha, ireA, iss, mchB mchC, mchF, ompT, stx2b, subA, terC, traT</i>                                                             | No                                             | -                                                         | 753        | -               | PT_EC0040 | ERS12460676    |
| Ec-TM87        | 2020/11    | Fallow deer | STEC      | Susceptible   | O75:H8       | <i>cba, cma, ehxA, espi, gad, iha, ireA, iss, lpfA, ompT, senB, stx1c, stx2b, subA, terC, traT</i>                                                              | No                                             | -                                                         | 13         | 5               | PT_EC0041 | ERS12460677    |
| Ec-TM89        | 2020/11    | Fallow deer | STEC      | Susceptible   | O146:H28     | <i>astA, ehxA, gad, hra, iha, ireA, iss, lpfA, mchB, mchC, mchF, ompT, stx2b, subA, terC, traT, usp</i>                                                         | No                                             | -                                                         | 738        | -               | PT_EC0042 | ERS12460678    |
| Ec-TM91        | 2020/11    | Fallow deer | STEC      | Susceptible   | O146:H28     | <i>astA, ehxA, gad, hra, iha, ireA, lpfA, mchB, mchC, mchF, ompT, stx2b, subA, terC, traT, usp</i>                                                              | No                                             | -                                                         | 738        | -               | PT_EC0043 | ERS12460679    |
| Ec-TM92        | 2020/11    | Fallow deer | STEC      | Susceptible   | O75:H8       | <i>cba, cma, ehxA, espi, gad, iha, ireA, iss, lpfA, ompT, senB, stx1c, stx2b, subA, terC, traT</i>                                                              | No                                             | -                                                         | 13         | 5               | PT_EC0044 | ERS12460680    |
| Ec-TM95        | 2020/11    | Fallow deer | STEC      | Susceptible   | O146:H21     | <i>cba, cma, ehxA, espi, gad, iha, ireA, iss, iucC, iutA, lpfA, mchB, mchC, mchF, ompT, senB, stx2b, subA, terC, traT</i>                                       | No                                             | -                                                         | 442        | 6               | PT_EC0045 | ERS12460681    |
| Ec-TM96        | 2020/11    | Fallow deer | STEC      | Susceptible   | O27:H30      | <i>astA, celb, chuA, eilA, iha, ireA, iss, mchB, mchC, mchF, ompT, stx2b, subA, terC, traT</i>                                                                  | No                                             | -                                                         | 753        | 8               | PT_EC0046 | ERS12460682    |
| Ec-TM97        | 2020/11    | Fallow deer | STEC      | Susceptible   | O146:H21     | <i>cba, cma, ehxA, espi, gad, iha, ireA, iss, iucC, iutA, lpfA, mchB, mchC, mchF, ompT, stx2b, subA, terC, traT</i>                                             | No                                             | -                                                         | 442        | 4               | PT_EC0047 | ERS12460683    |
| Ec-TM98        | 2020/11    | Fallow deer | STEC      | Susceptible   | O75:H8       | <i>cba, cma, ehxA, espi, gad, iha, ireA, iss, lpfA, ompT, senB, stx1c, stx2b, subA, terC, traT</i>                                                              | No                                             | -                                                         | 13         | -               | PT_EC0048 | ERS12460684    |
| Ec-TM99        | 2020/11    | Fallow deer | STEC      | Susceptible   | O146:H21     | <i>cba, cma, ehxA, espi, gad, iha, ireA, iss, iucC, iutA, lpfA, mchB, mchC, mchF, ompT, stx2b, subA, terC, traT</i>                                             | No                                             | -                                                         | 442        | 4               | PT_EC0049 | ERS12460685    |
| Ec-TM100       | 2020/11    | Fallow deer | EPEC      | AMP, NAL, CIP | O108:H9      | <i>cea, chuA, cia, eae, espA, espB, espi, gad, iss, mchF, neuC, nleC, ompT, terC, tir, traT</i>                                                                 | <i>blaTEM-1D, qnrB36, qnrB19, qnrB82, gyrA</i> | Col (100%), IncFII (100%), IncX1 (98.94%), pO111 (98.98%) | 302        | -               | PT_EC0050 | ERS12460686    |
| Ec-TM101       | 2020/11    | Fallow deer | EPEC      | Susceptible   | O156:H25     | <i>astA, eae, ehxA, espA, espF, espi, espP, etpD, gad, lpfA, nleA, nleB, ompT, terC, tir, traT</i>                                                              | No                                             | -                                                         | 300        | 3               | PT_EC0051 | ERS12460687    |
| Ec-PBG1        | 2020/11    | Hedgehog    | EPEC      | Susceptible   | O35:H31      | <i>astA, chuA, cij, eae, efa1, espA, fyuA, gad, ibeA, irp2, nleB, nleC, ompT, sitA, terC, tir, traT, usp, yjcV</i>                                              | No                                             | -                                                         | 123        | -               | PT_EC0068 | ERS12460704    |

| Isolate ID                 | Year/Month | Animal     | Serotype     | AMR phenotype | MLST | Resistance genes   | Plasmids                       | Sample ID | Ena Acession # |
|----------------------------|------------|------------|--------------|---------------|------|--------------------|--------------------------------|-----------|----------------|
| <i>Salmonella enterica</i> |            |            |              |               |      |                    |                                |           |                |
| Se-TM77                    | 2020/11    | Red deer   | Schleissheim | Susceptible   | 53   | <i>aac(6')-Iaa</i> | Not found                      | PT_SE0144 | ERS12843885    |
| Se-TM79                    | 2020/11    | Wild boars | Enteritidis  | Susceptible   | 11   | <i>aac(6')-Iaa</i> | IncFII (100%), IncFIB (98.91%) | PT_SE0145 | ERS12843886    |
| Se-TM83                    | 2020/11    | Wild boars | Schleissheim | Susceptible   | 53   | <i>aac(6')-Iaa</i> | Not found                      | PT_SE0146 | ERS12843887    |

| Isolate ID           | Year/Month | Animal | Species        | AMR phenotype | MLST | Resistance genes             | Sample ID   | Ena Acession # |
|----------------------|------------|--------|----------------|---------------|------|------------------------------|-------------|----------------|
| <i>Campylobacter</i> |            |        |                |               |      |                              |             |                |
| Cc_PBG26             | 2021/01    | Geneta | <i>C. coli</i> | AMP, CIP, TET | 1595 | <i>blaOXA-61, gyrA, tetO</i> | PT_CC_PBG26 | ERS13408374    |
